# Supplementary material
Source: Springer Nature journal article supplement (https://www.springermedizin.de/resource/supplementary/12887_2012_713_MOESM1_ESM.pdf/9475604)

# Nunavut

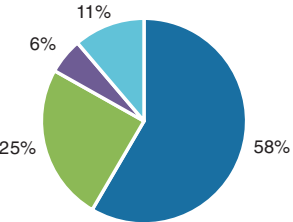

# Canada

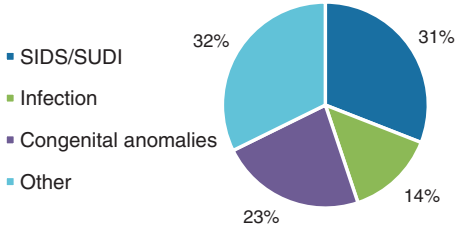

- SIDS/SUDI
- Infection
- Congenital anomalies
- Other

Supplement: MOESM1 [file 9475604]
